# Supplementary material for: Multiple endocrine neoplasia type 1: a new germline “homozygous” variant (c.201delC) caused by detection errors
Source: Springer Nature journal article supplement (doi:10.1186/s13053-022-00216-2), 2022-03-07

1 **Supplementary Files**

2 **Methods**

3 *Laboratory examination*

4 Serum tests for pituitary-related hormones, thyroid and parathyroid hormones, blood  
5 glucose, insulin, C-peptide, and bone metabolism-related tests were accomplished in  
6 the proband, as well as the related gland function evaluation test. These examinations  
7 were performed by the professional Laboratory Medicine Staff in the Medical  
8 Laboratory Center, the First Hospital of China Medical University. Pituitary-related  
9 hormones levels were measured using IMMULITE2000XPi (SIEMENS AG FWB :  
10 SIE, NYSE : SI), thyroid related hormones levels were measured using Cobas 601  
11 analyzer (Roche Diagnostic, Switzerland). Blood glucose, insulin, C-peptide were  
12 measured using maglumi4000 (Shenzhen New Industries Biomedical Engineering Co.,  
13 Ltd, China). Bone metabolism related hormones levels were measured using  
14 cobas®8000 e 801 (Roche Diagnostic, Switzerland).

15 *Imaging examination*

16 For a diagnosis of MEN1, the proband completed several imaging examinations,  
17 including an ultrasound, CT (computed tomography), MRI (magnetic resonance  
18 imaging), endoscopic ultrasound (EUS), and parathyroid ECT (emission computed  
19 tomography).

20 *Sanger sequencing*

21 A 5-ml sample of peripheral blood was collected from the proband and each of her  
22 six relatives mentioned, anticoagulated with ethylenediaminetetraacetic acid (EDTA),

23 and stored at  $-80^{\circ}\text{C}$ . Later, whole-genome DNA was extracted. Sanger sequencing was  
24 performed on the peripheral blood samples of the six family members using an ABI  
25 3730 sequencer to verify the co-segregation of genotype and phenotype. The DNA  
26 sequence of *MEN1* (NM\_130802) was queried in the Ensembl Genome Browser, and  
27 Primer Premier 6.0 was used to design primers for verification, the gene sequence  
28 corresponding to the primer are as follows (Supplementary Fig. 2):

29 1<sup>st</sup> times detection: GGGTGG AACCTTAGCGG, AGATGAAATTGGGCTGCA.

30 2<sup>nd</sup> times detection: GGGTGG AACCTTAGCGG, CCTCTTTGCAGTTGGGAAAC.

31 3<sup>rd</sup> times detection: GACCTGGTGCTCCTTTCCTT, TGTCTATCATCGCCGCCC.

### 32 ***Multiplex ligation-dependent probe amplification (MLPA)***

33 DNA (100 ng) was denatured by heating to  $98^{\circ}\text{C}$  in a thermocycler. The multiplex  
34 ligation-dependent probe amplification (MLPA) probes (probeset name: P017-D1  
35 MEN1, version number: Lot D1-0716, MRC Holland) and buffer were added, and then  
36 the samples were left overnight at  $60^{\circ}\text{C}$  for hybridization. The ligase and ligase buffer  
37 were added, and the samples were ligated at  $54^{\circ}\text{C}$  for 15 min. The ligase was  
38 inactivated by heating to  $98^{\circ}\text{C}$ . PCR primers, dNTPs, and polymerase were added, and  
39 the PCR was started. The products were analyzed by capillary electrophoresis.

40 Coffalyser.Net Server (versions: v.140721.1958) was used for the analysis of  
41 sequencing and MLPA reads.

42

43 **Table 1. The laboratory examination results of hypoglycemia occurred.**

| Items                                     | Results | Normal range |
|-------------------------------------------|---------|--------------|
| Hypoglycemia occurred for the first time  |         |              |
| Intravenous glucose (mmol/l)              | 2.63    | 3.89-6.38    |
| Synchronous insulin (mIU/L)               | 25.86   | 4.03-23.46   |
| Synchronous c-peptide (pmol/L)            | 2052.1  | 99.9-1242.09 |
| Synchronous proinsulin (pg/mL)            | 253.10  | 30-180       |
| Insulin release index                     | 0.55    | <0.3         |
| Hypoglycemia occurred for the second time |         |              |
| Intravenous glucose (mmol/l)              | 1.72    | 3.89-6.38    |
| Synchronous insulin (mIU/L)               | 16.21   | 4.03-23.46   |
| Synchronous c-peptide (pmol/L)            | 1994    | 99.9-1242.09 |
| Synchronous proinsulin (pg/mL)            | 264.1   | 30-180       |
| Insulin release index                     | 0.52    | <0.3         |

44 Table 1. The proband's serum glucose, insulin (INI), C-peptide (CPS), and pro-insulin  
 45 (pro-INS) levels were tested when hypoglycemia occurred. The insulin release indexes  
 46 were 0.55 and 0.52 (normal range <0.3) during the twice hypoglycemia, respectively.  
 47 Glucose was decreased while the insulin level was either in the normal reference range  
 48 or increased at the time of the hypoglycemia.

49

50 **Table 2. The results of prolonged OGTT.**

|         | Glucose (mmol/l) | Insulin (mIU/L)<br>(4.03-23.46) | C-peptide (pmol/L)<br>(99.9-1242.09) |
|---------|------------------|---------------------------------|--------------------------------------|
| 0 min   | 5.16             | 15.45                           | 1480.8                               |
| 30 min  | 10.49            | 231.3                           | 10060.5                              |
| 60 min  | 13.11            | 217.2                           | 10294.6                              |
| 120 min | 6.57             | 41.31                           | 7194.8                               |
| 180 min | 3.72             | 21.52                           | 3098.6                               |
| 240 min | 2.01             | 17.54                           | 2501                                 |
| 300 min | 1.95             | 15.2                            | 1855                                 |

51 Table 2. The prolonged oral glucose tolerance test (OGTT) results presented  
 52 hypoglycemia at the 240th and 300th minute with glucose levels of 2.01 mmol/L and  
 53 1.95 mmol/L, respectively. The corresponding insulin release indexes were 0.48 and  
 54 0.43 (normal range <0.3), respectively.

55 **Figure 1. Multiplex ligation-dependent probe amplification (MLPA) results.**

56 MLPA results showed that the *MEN1* gene was not deleted in the proband (II-3), the proband's sister (II-1), the proband's niece (III-1), and the  
 57 proband's son (III-2).

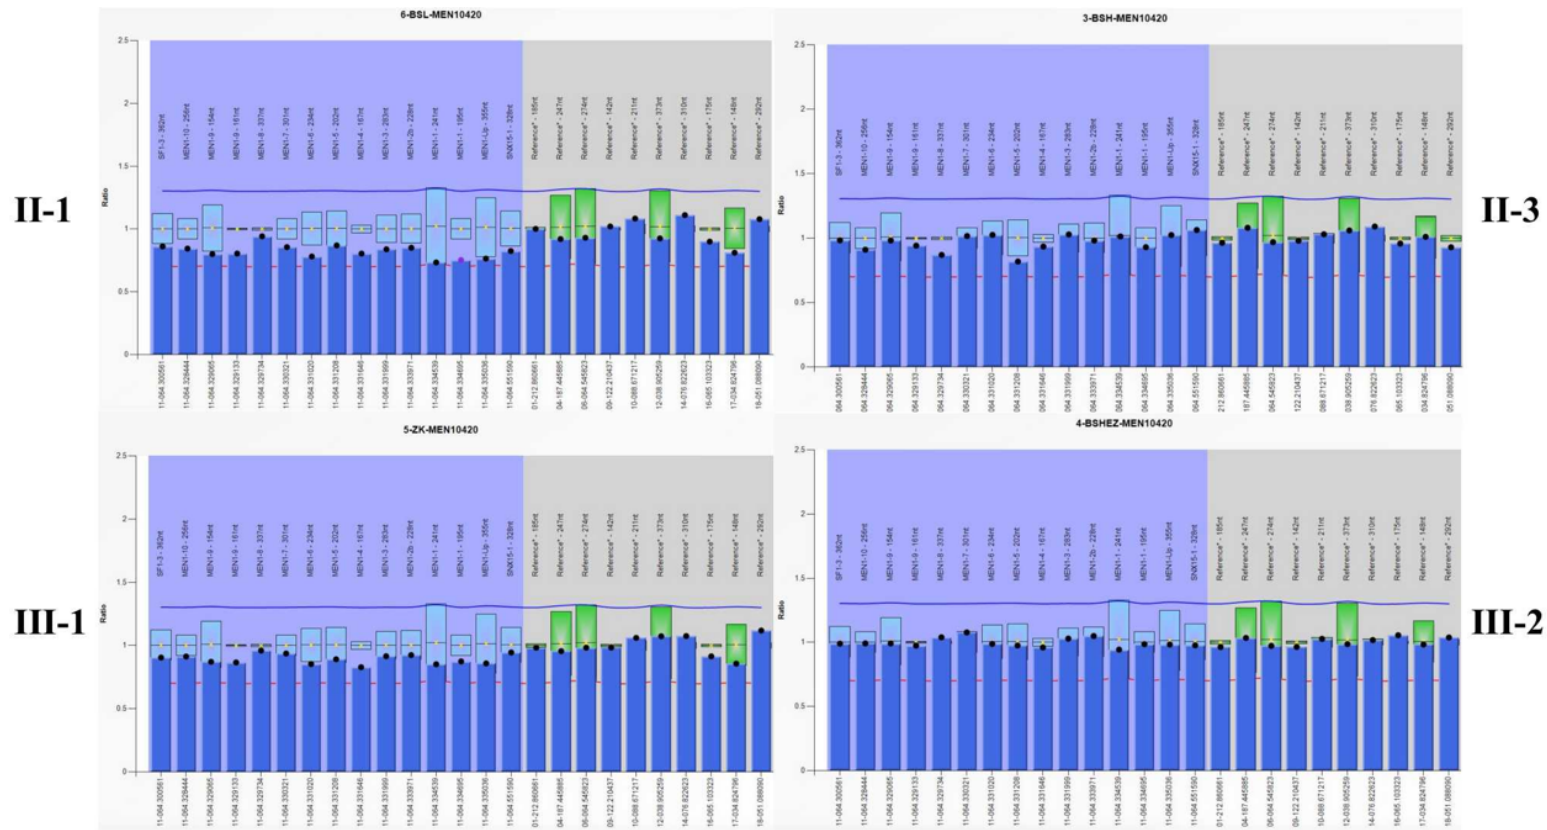

59 **Figure 2. Schematic diagram of the gene sequence corresponding to the primers of the three times genetic detection.**

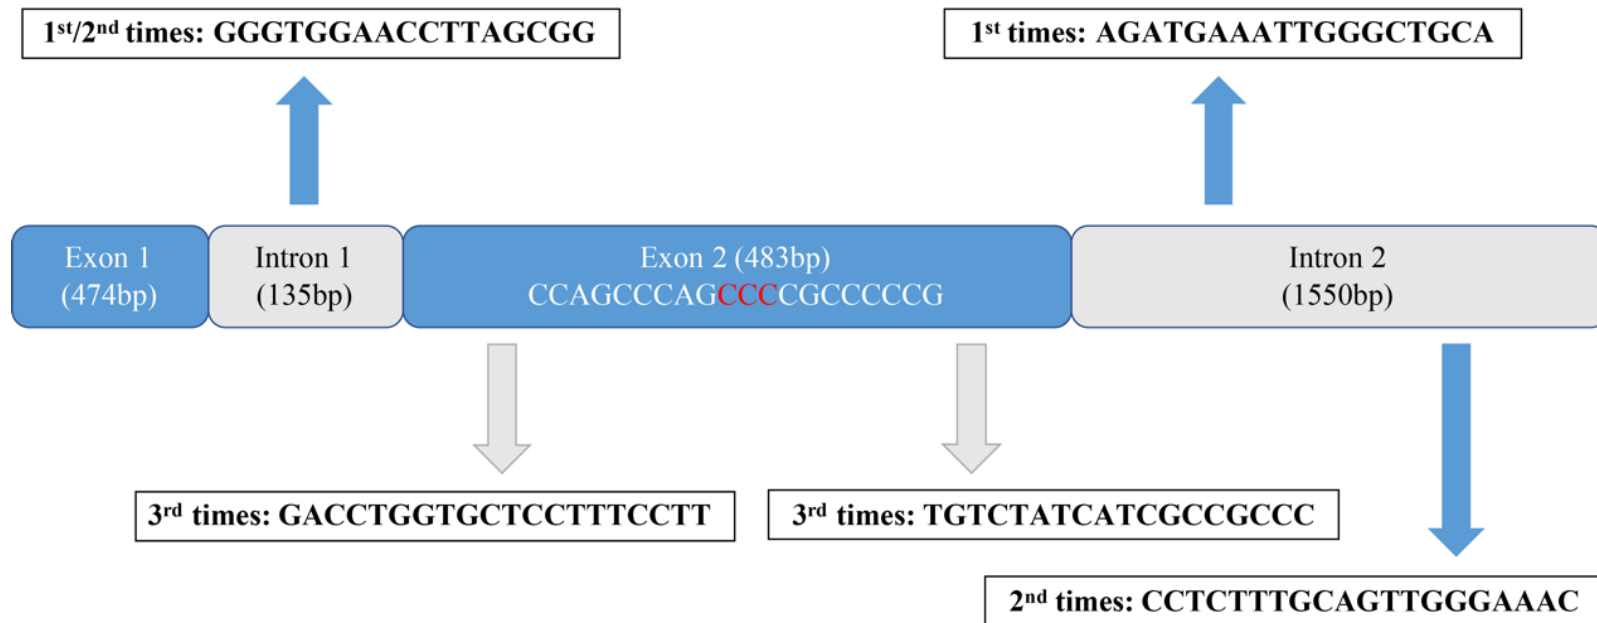

Supplement: MOESM1 [file 20198480]
